# Supplementary material for: Using nontargeted LC-MS metabolomics to identify the association of biomarkers in pig feces with feed efficiency
Source: Research Square preprint supplement (doi:10.21203/rs.3.rs-101175/v1), 2020-11-09
Supplement: Supplementary file 1 [file f797552d90ea58120e1b8e19.xlsx]

## Sheet: Table S4
Table S4. The result of real-time qPCR
Gene name	Up/down regulation	Fold change	Yes/no
CYP27A1	up	2.0475	yes
CYP7A1	up	4.90302	yes
FADS2	up	1.26633	yes
FADS1	up	2.5614	yes
FRS2	up	3.13686	yes
SQLE	down	2.67755	no
NR1H4	down	1.38992	no
Up or down indicates the expected gene expression trend. Fold change = expression value of high-FE group/expression value of low-FE group.Yes or no indicates whether the gene expression level is consistent with the expected change trend.
